# Supplementary material for: The earliest dipodomyine heteromyid in North America and the phylogenetic relationships of geomorph rodents
Source: PeerJ. 2023 Mar 8;11:e14693. doi: 10.7717/peerj.14693 (PMC10007967; doi:10.7717/peerj.14693)
Supplement: Table S3 — Definitions of measurements are provided in Table S2. [file peerj-11-14693-s003.xlsx]

## Sheet: Total Data
Species	Specimen	Sex	Locality	Side	SkullL	MCW	OrbW	NasalL	rostWpost	rostDpost	bullaL	bullaW	rostperfL	rostperfD	udiastL	formagW	dentL	ldiastL	dentDm1	I1L	I1W	P4L	P4W	M1L	M1W	M2L	M2W	M3L	M3W	P4-M3L	i1L	i1W	p4L	p4W	m1L	m1W	m2L	m2W	m3L	m3W	p4-m3L	mt3W	mt4W	pph3L	pph3W	pph4L	pph4W
Aurimys xeros	UNSM 27016		Johnson Canyon (UCMP V6432), Grant County, OR	L	48.5	26.5	10.52	17.54	9.9	11.65	17.21	9.13	5.26	3.31	15.51	6.7	34.81	9.01	6.64	2.66	1.62	2.42	2.47	1.92	2.63	1.84	2.46			9.41	2.52	1.63	2.04	2.01	1.86	2.37	1.86	2.56	1.91	2.08	8.58	1.91	1.99	8.07	1.54	6.57	1.13
				R																		2.39	2.49	1.87	2.56	1.8	2.35	1.66	1.93	9.38
Cupidinimus nebraskensis	CMNH 10193																					0.86	1.05					0.58	0.81				0.84	0.89	0.87	1.02	0.77	0.91	0.57	0.69	3.01	0.8	0.7
Cupidinimus nebraskensis	CMNH 10170																					1.09	1.12	0.9	1.08	0.8	0.96	0.67	0.8	3.2
Eodipodomys celtiservator	UGV 109																					2.1	2	1.45	2.3						2.4	1.25	2.7	1.8	1.95	2	1.4	1.85	0.8	1.15	6.55
Prodipodomys mascallensis	UCMP 39094																	4.2	4.7												1.5	0.8	1	1.2	1.4	1.4	1.3	1.5	1.2	1.3	4.8
Prodipodomys sp.	AMNH 87427		Stegomastodon Quarry, Brown Co., NE		--	--	--	--	7.349	--	--	--	2.4	1.37	8.84	--	--	4.215	3.854	1.474	0.92	1.249	1.411	1.149	1.517	1.024	1.38	--	--	--	1.291	0.732	1.173	1.272	1.176	1.422	1.028	1.416	0.813	0.988	4.785	1.19	0.95	5.38	0.81	5.52	0.77
Prodipodomys idahoensis	NAUQSP 2226																																0.73	1.12	1.04	1.53	0.98	1.58	0.85	0.9	3.93
Prodipodomys idahoensis	ETMNH Z2227		Blancan, AZ																	1.24	0.82	1.15	1.77	1.08	1.67	0.99	1.42	0.74	0.97	4.4
Dipodomys deserti	ETMNH Z5183	?			35.94	30.77	13.93	16.32	8.08	8.98	18.3	13.11	3.77	2.92	10.49	5.16	22.04	6.1	5.67	1.94	1.17	1.28	1.86	1.31	1.98	1.23	1.95	1.3	1.22	5.09	1.64	0.94	1.35	1.7	0.96	1.83	1.02	1.65	0.85	1.31	5.36
Dipodomys deserti	ETMNH Z2260																																									1.36	1.29	8.97	1.06	8.6	1.11
Dipodomys deserti	ETMNH Z2261																																									1.52	1.33	8.55	1.19	8.19	1.22
Dipodomys deserti	ETMNH Z2262																																									1.56	1.36	8.66	1.2	8.59	1.18
Dipodomys deserti	ETMNH Z6653				34.33	31.39	16.91	16.36	7.51	9.19	19.52	14.3	3.71	3.29	9.37	4.83				1.86	1.08	1.3	2.16	1.1	2.29	1.19	2.2	0.98	1.57	5.13
Dipodomys heermanni	ETMNH Z17752																																											9.28	1.1	9.12	1.09
Dipodomys heermanni	CM 61020	M	San Luis National Wildlife Refuge, Merced Co., CA		29.799	23.675	11.992	13.751	6.73	8.077	10.045	8.915	3.129	2.777	9.098	4.742	19.29	5.31	4.446	1.569	1.021	0.988	1.383	0.938	1.531	0.889	1.333	1.037	0.938	4.599	1.352	0.731	1.092	1.191	0.844	1.39	0.844	1.241	0.695	0.993	3.86
Dipodomys heermanni	USNM 64310	F	Carbondale, Amador Co., CA		31.123	23.742	12.311	14.223	6.543	8.441	11.5	9.83	3.423	2.822	9.312	4.8	18.897	4.795	4.56	1.382	1.066	0.968	1.452	0.914	1.614	0.968	1.345	0.914	1.022	5.056	1.365	0.914	1.418	1.361	1.021	1.673	0.936	1.418	0.822	1.106	4.876
Dipodomys heermanni	USNM 127158	F	Alila, Tulare Co., CA		30.914	24.267	10.137	13.85	7.256	8.698	11.7	9.552	2.899	2.336	9.3	4.767	18.959	4.805	4.28	1.569	0.959	1.072	1.532	1.072	1.583	0.97	1.532	0.97	1.124	4.86	1.376	0.853	1.277	1.549	1.005	1.495	1.005	1.44	0.87	1.114	4.322
Dipodomys heermanni	USNM 118924	M	Salinas, Monterey Co., CA		31.254	24.866	12.244	14.02	6.898	8.838	11.818	10.087	3.811	2.865	9.86	4.995	19.961	5.039	4.609	1.569	1.203	1.173	1.546	1.12	1.706	0.96	1.546	0.853	1.28	5.102	1.467	0.983	1.412	1.442	1.153	1.671	1.037	1.556	0.72	1.21	4.455
Dipodomys heermanni	CM 84429	F	Carrizo Plains, San Luis Obispo Co., CA		30.402	24.617	12.265	13.526	6.914	7.971	10.948	9.713	3.319	2.529	9.213	4.66	19.027	5.112	4.608	1.492	1.081	1.045	1.428	1.08	1.567	1.08	1.358	0.94	0.94	4.674	1.304	0.893	1.348	1.419	0.993	1.49	0.922	1.277	0.709	0.922	4.11
Dipodomys ingens	USNM 128801	M	Mckittrick, Kern Co., CA		35.612	28.499	13.677	15.627	7.699	9.87	13.58	11.708	3.767	2.441	10.8	5.286	22.6	6.8	5.7	1.906	1.304	1.322	1.677	1.226	1.806	1.097	1.613	1.129	1.193	5.4	1.595	0.986	1.515	1.515	1.154	1.731	1.082	1.587	0.938	1.154	5.879
Dipodomys ingens	USNM 140321	F	Coalinga, Fresno Co., CA		35.322	28.679	14.097	15.806	8.03	9.969	12.722	11.133	3.469	2.591	10.61	5.126	23.111	6.18	4.72	1.825	1.427	1.361	1.728	1.309	1.858	1.126	1.728	1.047	1.204	5.146	1.63	1.001	1.553	1.652	1.157	1.884	1.091	1.686	0.925	1.322	5.646
Dipodomys ingens	USNM 149734	F	Tulare Lake, Kings Co., CA		34.064	28.093	13.498	16.1	7.542	9.318	13.012	11.548	2.944	2.683	9.9	5.453	21.8	6.6	5.1	1.867	1.308	1.253	1.607	1.253	1.896	1.061	1.607	1.157	1.286	4.864	1.625	1.082	1.628	1.495	1.163	1.86	0.997	1.728	0.764	1.229	4.924
Dipodomys ingens	USNM 150402	M	Lerdo, Fresno Co., CA		33.366	28.4	13.783	15.866	7.705	9.676	13.417	11.71	2.898	2.166	8.9	5.404	21	6.5	5.1	1.84	1.198	1.142	1.631	1.109	1.859	1.076	1.696	1.109	1.468	5.064	1.458	0.949	1.423	1.622	1.059	1.754	1.059	1.688	0.827	1.324	4.859
Dipodomys ingens	USNM 177691	F	Cuyama Valley, CA		34.301	28.6	13.596	15.519	7.929	10.395	12.981	11.363	3.046	2.814	9.3	5.35	21.8	6.2	5.2	1.974	1.354	1.19	1.505	1.19	1.715	1.155	1.54	--	--	5.028	1.666	0.98	1.364	1.435	1.184	1.651	1.005	1.579	0.897	1.184	4.618
Dipodomys merriami	ETMNH Z2256				29.49	23.22	13.38	13.29	6.19	7.14	15.55	9.18	2.76	2.68	8.3	4.24	17.76	4.02	4.41	1.7	0.94	1.1	1.65	0.98	1.73	0.91	1.5	0.79	1.1	3.84	1.33	0.78	1.36	1.51	0.99	1.67	0.87	1.51	0.78	1.17	4.2			5.66	0.85	5.04	0.79
Dipodomys merriami	ETMNH Z2251																																									1.04	1.04	5.92	0.77	5.88	0.74
Dipodomys merriami	ETMNH Z5084				28.62	22.35	13.03	12.69	5.81	7.01	14.69	8.47	3.49	2.24	8.3	4.17	17.27	4.09	3.85	1.65	0.93	0.97	1.43	0.93	1.55	0.79	1.48	0.68	1.32	3.49	1.3	0.75	1.03	1.36	0.83	1.48	0.82	1.46	0.71	0.99	3.47
Dipodomys merriami	ETMNH Z13469							14	5.36	7.29	15.01	9.57	2.37	2.11	8.07		18.04	3.83	3.79	1.55	0.92	1.09	1.54	0.81	1.68	1.05	1.54	1.13	1.36	3.96	1.25	0.76	1.67	1.33	1.22	1.29	0.94	1.33	0.82	0.98	4.67	1.09	0.94	6.24	0.76	6.09	0.7
Dipodomys merriami	ETMNH Z17762				28.81	23.71	12.79	13.28	6.38	7.87	13.65	9.82	2.48	2.31	8.57	3.99	16.9	4.24	4.05	1.67	1.14	0.99	1.5	0.89	1.65	0.85	1.49	0.75	1.15	3.65	1.35	0.75	1.17	1.47	0.79	1.57	0.8	1.44	0.63	1.11	3.73
Dipodomys merriami	ETMNH Z17769				26.75	22.25	13.4	12.38	5.66	6.74	14.83	9.5	2.89	2.43	8.11	4.09	18.22	4.26	4.58	1.51	0.96	0.9	1.54	0.89	1.68	0.82	1.5	0.78	1.04	3.7	1.33	0.77	1.18	1.53	0.96	1.71	0.86	1.66	0.69	1.08	4.14
Dipodomys merriami	UCLA 18124	F			27.16	22.75	13.23	11.99	5.77	7.71	14.21	11.1	3.1	2.78	7.78	4.23	16.72	3.68	4.6	1.79	0.64	1.18	1.49	0.99	1.82	0.9	1.7	0.72	1.36	4.06	1.37	0.63	1.21	1.49	0.82	1.44	0.79	1.41	0.64	1.32	3.69
Dipodomys merriami	UCLA EX14	F			26.35	22.16	12.69	11.87	5.37	7.03	13.35	10.31	2.6	2.17	7.03	3.81	15.29	3.72	3.91	1.48	0.67	1.04	1.56	0.85	1.55	0.82	1.26	0.79	1.06	3.81	1.27	0.65	0.95	1.23	0.65	1.48	0.82	1.55	0.89	1.22	3.89
Dipodomys merriami	UCLA F27	F			26.04	22.02	12.59	12.19	5.85	7.56	12.99	9.84	3.52	2.78	7.55	4.2	15.57	3.33	4.08	1.62	0.66	0.94	1.44	0.88	1.54	0.81	1.45	0.93	1.04	3.84	1.46	0.64	1.12	1.49	0.82	1.49	0.78	1.34	0.68	1.12	3.75
Dipodomys merriami	UCLA F28	M			27.29	22.2	11.89	10.83	6.24	7.82	13.66	9.85	3.29	2.54	7.37	3.99	15.95	3.41	4.44	1.83	0.81	1.13	1.65	0.86	1.72	0.81	1.61	0.83	1.35	3.86	1.49	0.64	0.98	1.27	0.66	1.21	0.66	1.27	0.54	1	3.21
Dipodomys merriami	UCLA F29	F			26.57	22.64	12..21	12.71	5.6	7.75	13.74	10.43	2.71	2.26	7.21	4.21	15.61	3.33	4.23	1.58	0.79	1.15	1.58	0.88	1.57	0.83	1.42	0.91	1.03	4.05	1.32	0.69	1.21	1.23	0.82	1.48	0.74	1.37	0.69	1.01	3.59
Dipodomys ordii	ETMNH Z10422				29.95	24.67	13.15		6.43	7.46	15.57	10.72	2.87	2.31	8.17	4.4	15.94	3.96	4.18	1.6	0.99	1.1	1.74	0.93	1.73	0.9	1.5	0.82	1.12	3.93	1.18	0.74	1.14	1.57	0.84	1.62	0.82	1.53	0.74	1.12	3.86
Dipodomys spectabilis	ETMNH Z5262				34.52	29.49	17.01	15.87	8.19	9.8	17.58	13.58	3.18	3.02	11.33	5.36	23.91	6.17	6.3	2.04	1.4	1.2	2.02	1.29	2.23	1.12	1.94	1.01	1.55	4.7	1.76	1.23	1.68	1.77	1.18	2.19	0.95	2	0.91	1.68	4.54
Dipodomys spectabilis	ETMNH Z2255																																									1.38	1.31	6.62	1.2	6.43	1.21
Dipodomys sp.	ETMNH Z10311																																											7.63	1.22	7.4	1.19
Microdipodops megacephalus	UCLA J587	M			20.3	17.56	6.83	7.46	4.1	5.4	13.16	8.4	2.39	1.73	5.9	3.09	12.52	3.02	2.73	1.03	0.55	0.85	1.02	0.75	1.03	0.55	0.92	0.5	0.67	2.98	0.81	0.52	1	0.92	0.75	1.02	0.8	1.11	0.48	0.78	3.05
Microdipodops megacephalus	UCLA J589	F			20.84	18.09	6.75	9.54	4	5.92	12.79	7.89	2.47	2.03	6.28	3.09	11.34	2.44	2.65	1.28	0.58	0.9	1.15	0.65	1.24	0.75	0.86	0.62	0.65	2.92	0.99	0.54	0.99	1.04	0.7	1.15	0.6	1.07	0.5	0.74	3.04
Microdipodops megacephalus	UCLA J605	M			20.92	18.79	6.66	10.47	4.1	5.89	13.39	8.8	2.55	2.11	6.1	3.05	12.12	2.76	2.66	1.25	0.66	1.07	1.28	0.84	1.2	0.69	0.9	0.56	0.72	3.12	0.99	0.63	1.13	1	0.79	1.1	0.66	0.97	0.55	0.76	3.19
Microdipodops megacephalus	UCLA J606	F			19.49	17.41	6.53	7.61	3.99	5.15	12.4	7.25	2.16	1.97	5.1	3.15	10.65	2.4	2.8	1.07	0.56	1.07	1.03	0.7	1.16	0.6	0.84	0.58	0.67	3.11	0.93	0.54	1.23	0.88	0.67	1.1	0.72	1.11	0.49	0.79	3.42
Microdipodops megacephalus	UCLA J657	F			20.37	17.89	6.68	9.42	3.77	5.44	12.76	8.07	2.56	1.97	6.06	2.92	11.48	2.59	2.56	1.26	0.74	0.96	1.13	0.68	0.96	0.62	0.93	0.49	0.62	2.89	1.03	0.69	0.98	0.99	0.67	1.03	0.63	1	0.51	0.58	3.11
Microdipodops pallidus	USNM 93520	F	Stillwater, Churchill Co., NV		20.734	19.581	6.732	9.822	3.839	5.311	9.327	7.96	2.38	1.767	5.865	3.529	12.446	2.821	1.804	1.044	0.604	0.931	1.125	0.737	1.203	0.621	0.892	0.466	0.543	3.163	0.958	0.527	0.811	0.962	0.83	1.057	0.679	0.906	0.491	0.604	3.132
Microdipodops pallidus	USNM 210397	M	Blair, Esmeralda Co., NV		20.286	19.817	6.952	9.358	3.685	5.509	9.813	7.417	2.006	1.677	5.642	3.229	11.347	2.458	1.886	1.102	0.573	1.329	1.251	0.782	1.212	0.626	0.978	0.508	0.587	3.597	0.898	0.472	0.927	1.059	0.776	1.192	0.738	1.078	0.549	0.794	3.613
Microdipodops pallidus	CM 18075	F	Mono Co., CA		20.204	19.279	7.167	9.855	4.169	5.57	9.823	7.482	2.202	1.418	5.685	3.13	12.44	2.845	2.503	1.034	0.84	1.077	1.243	0.912	1.202	0.704	0.994	0.663	0.663	3.755	0.935	0.591	1.01	0.919	0.796	0.949	0.674	0.98	0.612	0.674	3.062
Microdipodops pallidus	CM 17092	F	Stillwater, Churchill Co., NV		21.559	18.6	6.69	9.48	3.799	5.422	9.537	7.173	2.265	1.579	5.6	3.564	12.2	2.831	2.507	1.094	0.627	0.876	0.966	0.725	1.057	0.694	0.725	0.513	0.513	3.3	0.979	0.491	1.037	1.037	0.763	1.068	0.641	0.824	0.732	0.549	3.08
Microdipodops pallidus	CM 17077	M	Stillwater, Churchill Co., NV		20.367	19.398	6.912	10.037	3.827	5.631	9.095	7.757	2.444	1.529	5.802	3.446	11.812	2.8	2.8	1.075	0.626	1.086	0.983	0.698	1.086	0.595	0.828	0.44	0.517	3.298	1.029	0.48	0.941	0.969	0.803	1.08	0.609	0.969	0.415	0.637	3.405

## Sheet: Definitions
Abbreviation	Definition
SkullL	Skull length (measured ventrall from occipital condyle to anterior margin of incisor)
MCW	Maximum cranial width
OrbW	Interorbital width
NasalL	Nasal length
rostWpost	Width of rostrum (posterior)
rostDpost	Depth of rostrum (posterior)
bullaL	Bulla length
bullaW	Bulla width
rostperfL	Rostral perforation length
rostperfD	Rostral perforation depth
udiastL	Upper diastema length
formagW	Foramen magnum width
dentL	Dentary length (condyle to tip of incisor)
ldiastL	lower diastema length
dentDm1	Depth of dentary at m1 (anterior root)
I1L	Upper incisor anteroposterior length measured at base of blade
I1W	Upper incisor mediolateral width measured at base of blade
P4L	Length of P4
P4W	Width of P4
M1L	Length of M1
M1W	Width of M1
M2L	Length of M2
M2W	Width of M2
M3L	Length of M3
M3W	Width of M3
P4-M3L	Upper toothrow length measured at alveolar level
i1L	Lower incisor anteroposterior length measured at base of blade
i1W	Lower incisor mediolateral width measured at base of blade
p4L	Length of p4
p4W	Width of p4
m1L	Length of m1
m1W	Width of m1
m2L	Length of m2
m2W	Width of m2
m3L	Length of m3
m3W	Width of m4
p4-m3L	Lower toothrow length measured at alveolar level
mt3W	Mediolateral diameter of the 3rd metatarsal measured midshaft
mt4W	Mediolateral diameter of the 4th metatarsal measured midshaft
pph3L	Length of the proximal phalanx of pes digit 3
pph3W	Mediolateral diameter of the proximal phalanx of digit 3 measured midshaft
pph4L	Length of the proximal phalanx of pes digit 4
pph4W	Mediolateral diameter of the proximal phalanx of digit 4 measured midshaft

## Sheet: Cranial
Species	Specimen	Sex	SkullL	MCW	OrbW	NasalL	rostWpost	rostDpost	bullaL	bullaW	rostperfL	rostperfD	udiastL	formagW	dentL	ldiastL	dentDm1
Aurimys xeros	UNSM 27016		48.5	26.5	10.52	17.54	9.9	11.65	17.21	9.13	5.26	3.31	15.51	6.7	34.81	9.01	6.64
Prodipodomys mascallensis	UCMP 39094															4.2	4.7
Prodipodomys sp.	AMNH 87427		--	--	--	--	7.349	--	--	--	2.4	1.37	8.84	--	--	4.215	3.854
Dipodomys deserti	ETMNH Z5183	?	45.52	30.77	13.93	16.32	8.08	8.98	18.3	13.11	3.77	2.92	10.49	5.16	22.04	6.1	5.67
Dipodomys deserti	ETMNH Z6653		34.33	31.39	16.91	16.36	7.51	9.19	19.52	14.3	3.71	3.29	9.37	4.83
Dipodomys heermanni	CM 61020	M	29.799	23.675	11.992	13.751	6.73	8.077	10.045	8.915	3.129	2.777	9.098	4.742	19.29	5.31	4.446
Dipodomys heermanni	USNM 64310	F	31.123	23.742	12.311	14.223	6.543	8.441	11.5	9.83	3.423	2.822	9.312	4.8	18.897	4.795	4.56
Dipodomys heermanni	USNM 127158	F	30.914	24.267	10.137	13.85	7.256	8.698	11.7	9.552	2.899	2.336	9.3	4.767	18.959	4.805	4.28
Dipodomys heermanni	USNM 118924	M	31.254	24.866	12.244	14.02	6.898	8.838	11.818	10.087	3.811	2.865	9.86	4.995	19.961	5.039	4.609
Dipodomys heermanni	CM 84429	F	30.402	24.617	12.265	13.526	6.914	7.971	10.948	9.713	3.319	2.529	9.213	4.66	19.027	5.112	4.608
Dipodomys ingens	USNM 128801	M	35.612	28.499	13.677	15.627	7.699	9.87	13.58	11.708	3.767	2.441	10.8	5.286	22.6	6.8	5.7
Dipodomys ingens	USNM 140321	F	35.322	28.679	14.097	15.806	8.03	9.969	12.722	11.133	3.469	2.591	10.61	5.126	23.111	6.18	4.72
Dipodomys ingens	USNM 149734	F	34.064	28.093	13.498	16.1	7.542	9.318	13.012	11.548	2.944	2.683	9.9	5.453	21.8	6.6	5.1
Dipodomys ingens	USNM 150402	M	33.366	28.4	13.783	15.866	7.705	9.676	13.417	11.71	2.898	2.166	8.9	5.404	21	6.5	5.1
Dipodomys ingens	USNM 177691	F	34.301	28.6	13.596	15.519	7.929	10.395	12.981	11.363	3.046	2.814	9.3	5.35	21.8	6.2	5.2
Dipodomys merriami	ETMNH Z2256		29.49	23.22	13.38	13.29	6.19	7.14	15.55	9.18	2.76	2.68	8.3	4.24	17.76	4.02	4.41
Dipodomys merriami	ETMNH Z5084		28.62	22.35	13.03	12.69	5.81	7.01	14.69	8.47	3.49	2.24	8.3	4.17	17.27	4.09	3.85
Dipodomys merriami	ETMNH Z13469					14	5.36	7.29	15.01	9.57	2.37	2.11	8.07		18.04	3.83	3.79
Dipodomys merriami	ETMNH Z17762		35.81	23.71	12.79	13.28	6.38	7.87	13.65	9.82	2.48	2.31	8.57	3.99	16.9	4.24	4.05
Dipodomys merriami	ETMNH Z17769		26.75	22.25	13.4	12.38	5.66	6.74	14.83	9.5	2.89	2.43	8.11	4.09	18.22	4.26	4.58
Dipodomys merriami	UCLA 18124	F	27.16	22.75	13.23	11.99	5.77	7.71	14.21	11.1	3.1	2.78	7.78	4.23	16.72	3.68	4.6
Dipodomys merriami	UCLA EX14	F	26.35	22.16	12.69	11.87	5.37	7.03	13.35	10.31	2.6	2.17	7.03	3.81	15.29	3.72	3.91
Dipodomys merriami	UCLA F27	F	26.04	22.02	12.59	12.19	5.85	7.56	12.99	9.84	3.52	2.78	7.55	4.2	15.57	3.33	4.08
Dipodomys merriami	UCLA F28	M	27.29	22.2	11.89	10.83	6.24	7.82	13.66	9.85	3.29	2.54	7.37	3.99	15.95	3.41	4.44
Dipodomys merriami	UCLA F29	F	26.57	22.64	12..21	12.71	5.6	7.75	13.74	10.43	2.71	2.26	7.21	4.21	15.61	3.33	4.23
Dipodomys ordii	ETMNH Z10422		29.95	24.67	13.15		6.43	7.46	15.57	10.72	2.87	2.31	8.17	4.4	15.94	3.96	4.18
Dipodomys spectabilis	ETMNH Z5262		34.52	29.49	17.01	15.87	8.19	9.8	17.58	13.58	3.18	3.02	11.33	5.36	23.91	6.17	6.3
Microdipodops megacephalus	UCLA J587	M	20.3	17.56	6.83	7.46	4.1	5.4	13.16	8.4	2.39	1.73	5.9	3.09	12.52	3.02	2.73
Microdipodops megacephalus	UCLA J589	F	20.84	18.09	6.75	9.54	4	5.92	12.79	7.89	2.47	2.03	6.28	3.09	11.34	2.44	2.65
Microdipodops megacephalus	UCLA J605	M	20.92	18.79	6.66	10.47	4.1	5.89	13.39	8.8	2.55	2.11	6.1	3.05	12.12	2.76	2.66
Microdipodops megacephalus	UCLA J606	F	19.49	17.41	6.53	7.61	3.99	5.15	12.4	7.25	2.16	1.97	5.1	3.15	10.65	2.4	2.8
Microdipodops megacephalus	UCLA J657	F	20.37	17.89	6.68	9.42	3.77	5.44	12.76	8.07	2.56	1.97	6.06	2.92	11.48	2.59	2.56
Microdipodops pallidus	USNM 93520	F	20.734	19.581	6.732	9.822	3.839	5.311	9.327	7.96	2.38	1.767	5.865	3.529	12.446	2.821	1.804
Microdipodops pallidus	USNM 210397	M	20.286	19.817	6.952	9.358	3.685	5.509	9.813	7.417	2.006	1.677	5.642	3.229	11.347	2.458	1.886
Microdipodops pallidus	CM 18075	F	20.204	19.279	7.167	9.855	4.169	5.57	9.823	7.482	2.202	1.418	5.685	3.13	12.44	2.845	2.503
Microdipodops pallidus	CM 17092	F	21.559	18.6	6.69	9.48	3.799	5.422	9.537	7.173	2.265	1.579	5.6	3.564	12.2	2.831	2.507
Microdipodops pallidus	CM 17077	M	20.367	19.398	6.912	10.037	3.827	5.631	9.095	7.757	2.444	1.529	5.802	3.446	11.812	2.8	2.8

## Sheet: Dental
Species	Specimen	Side	I1L	I1W	P4L	P4W	M1L	M1W	M2L	M2W	M3L	M3W	P4-M3L	i1L	i1W	p4L	p4W	m1L	m1W	m2L	m2W	m3L	m3W	p4-m3L
Aurimys xeros	UNSM 27016	L	2.66	1.62	2.42	2.47	1.92	2.63	1.84	2.46			9.41	2.52	1.63	2.04	2.01	1.86	2.37	1.86	2.56	1.91	2.08	8.58
		R			2.39	2.49	1.87	2.56	1.8	2.35	1.66	1.93	9.38
Cupidinimus nebraskensis	CMNH 10193				0.86	1.05					0.58	0.81				0.84	0.89	0.87	1.02	0.77	0.91	0.57	0.69	3.01
	CMNH 10170				1.09	1.12	0.9	1.08	0.8	0.96	0.67	0.8	3.2
Eodipodomys celtiservator	UGV 109				2.1	2	1.45	2.3						2.4	1.25	2.7	1.8	1.95	2	1.4	1.85	0.8	1.15	6.55
Prodipodomys mascallensis	UCMP 39094													1.5	0.8	1	1.2	1.4	1.4	1.3	1.5	1.2	1.3	4.8
Prodipodomys sp.	AMNH 87427		1.474	0.92	1.249	1.411	1.149	1.517	1.024	1.38	--	--	--	1.291	0.732	1.173	1.272	1.176	1.422	1.028	1.416	0.813	0.988	4.785
Prodipodomys idahoensis	NAUQSP 2226															0.73	1.12	1.04	1.53	0.98	1.58	0.85	0.9	3.93
Prodipodomys idahoensis	ETMNH Z2227		1.24	0.82	1.15	1.77	1.08	1.67	0.99	1.42	0.74	0.97	4.4
Dipodomys deserti	ETMNH Z5183		1.94	1.17	1.28	1.86	1.31	1.98	1.23	1.95	1.3	1.22	5.09	1.64	0.94	1.35	1.7	0.96	1.83	1.02	1.65	0.85	1.31	5.36
Dipodomys deserti	ETMNH Z6653		1.86	1.08	1.3	2.16	1.1	2.29	1.19	2.2	0.98	1.57	5.13
Dipodomys heermanni	CM 61020		1.569	1.021	0.988	1.383	0.938	1.531	0.889	1.333	1.037	0.938	4.599	1.352	0.731	1.092	1.191	0.844	1.39	0.844	1.241	0.695	0.993	3.86
Dipodomys heermanni	USNM 64310		1.382	1.066	0.968	1.452	0.914	1.614	0.968	1.345	0.914	1.022	5.056	1.365	0.914	1.418	1.361	1.021	1.673	0.936	1.418	0.822	1.106	4.876
Dipodomys heermanni	USNM 127158		1.569	0.959	1.072	1.532	1.072	1.583	0.97	1.532	0.97	1.124	4.86	1.376	0.853	1.277	1.549	1.005	1.495	1.005	1.44	0.87	1.114	4.322
Dipodomys heermanni	USNM 118924		1.569	1.203	1.173	1.546	1.12	1.706	0.96	1.546	0.853	1.28	5.102	1.467	0.983	1.412	1.442	1.153	1.671	1.037	1.556	0.72	1.21	4.455
Dipodomys heermanni	CM 84429		1.492	1.081	1.045	1.428	1.08	1.567	1.08	1.358	0.94	0.94	4.674	1.304	0.893	1.348	1.419	0.993	1.49	0.922	1.277	0.709	0.922	4.11
Dipodomys ingens	USNM 128801		1.906	1.304	1.322	1.677	1.226	1.806	1.097	1.613	1.129	1.193	5.4	1.595	0.986	1.515	1.515	1.154	1.731	1.082	1.587	0.938	1.154	5.879
Dipodomys ingens	USNM 140321		1.825	1.427	1.361	1.728	1.309	1.858	1.126	1.728	1.047	1.204	5.146	1.63	1.001	1.553	1.652	1.157	1.884	1.091	1.686	0.925	1.322	5.646
Dipodomys ingens	USNM 149734		1.867	1.308	1.253	1.607	1.253	1.896	1.061	1.607	1.157	1.286	4.864	1.625	1.082	1.628	1.495	1.163	1.86	0.997	1.728	0.764	1.229	4.924
Dipodomys ingens	USNM 150402		1.84	1.198	1.142	1.631	1.109	1.859	1.076	1.696	1.109	1.468	5.064	1.458	0.949	1.423	1.622	1.059	1.754	1.059	1.688	0.827	1.324	4.859
Dipodomys ingens	USNM 177691		1.974	1.354	1.19	1.505	1.19	1.715	1.155	1.54	--	--	5.028	1.666	0.98	1.364	1.435	1.184	1.651	1.005	1.579	0.897	1.184	4.618
Dipodomys merriami	ETMNH Z2256		1.7	0.94	1.1	1.65	0.98	1.73	0.91	1.5	0.79	1.1	3.84	1.33	0.78	1.36	1.51	0.99	1.67	0.87	1.51	0.78	1.17	4.2
Dipodomys merriami	ETMNH Z5084		1.65	0.93	0.97	1.43	0.93	1.55	0.79	1.48	0.68	1.32	3.49	1.3	0.75	1.03	1.36	0.83	1.48	0.82	1.46	0.71	0.99	3.47
Dipodomys merriami	ETMNH Z13469		1.55	0.92	1.09	1.54	0.81	1.68	1.05	1.54	1.13	1.36	3.96	1.25	0.76	1.67	1.33	1.22	1.29	0.94	1.33	0.82	0.98	4.67
Dipodomys merriami	ETMNH Z17762		1.67	1.14	0.99	1.5	0.89	1.65	0.85	1.49	0.75	1.15	3.65	1.35	0.75	1.17	1.47	0.79	1.57	0.8	1.44	0.63	1.11	3.73
Dipodomys merriami	ETMNH Z17769		1.51	0.96	0.9	1.54	0.89	1.68	0.82	1.5	0.78	1.04	3.7	1.33	0.77	1.18	1.53	0.96	1.71	0.86	1.66	0.69	1.08	4.14
Dipodomys merriami	UCLA 18124		1.79	0.64	1.18	1.49	0.99	1.82	0.9	1.7	0.72	1.36	4.06	1.37	0.63	1.21	1.49	0.82	1.44	0.79	1.41	0.64	1.32	3.69
Dipodomys merriami	UCLA EX14		1.48	0.67	1.04	1.56	0.85	1.55	0.82	1.26	0.79	1.06	3.81	1.27	0.65	0.95	1.23	0.65	1.48	0.82	1.55	0.89	1.22	3.89
Dipodomys merriami	UCLA F27		1.62	0.66	0.94	1.44	0.88	1.54	0.81	1.45	0.93	1.04	3.84	1.46	0.64	1.12	1.49	0.82	1.49	0.78	1.34	0.68	1.12	3.75
Dipodomys merriami	UCLA F28		1.83	0.81	1.13	1.65	0.86	1.72	0.81	1.61	0.83	1.35	3.86	1.49	0.64	0.98	1.27	0.66	1.21	0.66	1.27	0.54	1	3.21
Dipodomys merriami	UCLA F29		1.58	0.79	1.15	1.58	0.88	1.57	0.83	1.42	0.91	1.03	4.05	1.32	0.69	1.21	1.23	0.82	1.48	0.74	1.37	0.69	1.01	3.59
Dipodomys ordii	ETMNH Z10422		1.6	0.99	1.1	1.74	0.93	1.73	0.9	1.5	0.82	1.12	3.93	1.18	0.74	1.14	1.57	0.84	1.62	0.82	1.53	0.74	1.12	3.86
Dipodomys spectabilis	ETMNH Z5262		2.04	1.4	1.2	2.02	1.29	2.23	1.12	1.94	1.01	1.55	4.7	1.76	1.23	1.68	1.77	1.18	2.19	0.95	2	0.91	1.68	4.54
Microdipodops megacephalus	UCLA J587		1.03	0.55	0.85	1.02	0.75	1.03	0.55	0.92	0.5	0.67	2.98	0.81	0.52	1	0.92	0.75	1.02	0.8	1.11	0.48	0.78	3.05
Microdipodops megacephalus	UCLA J589		1.28	0.58	0.9	1.15	0.65	1.24	0.75	0.86	0.62	0.65	2.92	0.99	0.54	0.99	1.04	0.7	1.15	0.6	1.07	0.5	0.74	3.04
Microdipodops megacephalus	UCLA J605		1.25	0.66	1.07	1.28	0.84	1.2	0.69	0.9	0.56	0.72	3.12	0.99	0.63	1.13	1	0.79	1.1	0.66	0.97	0.55	0.76	3.19
Microdipodops megacephalus	UCLA J606		1.07	0.56	1.07	1.03	0.7	1.16	0.6	0.84	0.58	0.67	3.11	0.93	0.54	1.23	0.88	0.67	1.1	0.72	1.11	0.49	0.79	3.42
Microdipodops megacephalus	UCLA J657		1.26	0.74	0.96	1.13	0.68	0.96	0.62	0.93	0.49	0.62	2.89	1.03	0.69	0.98	0.99	0.67	1.03	0.63	1	0.51	0.58	3.11
Microdipodops pallidus	USNM 93520		1.044	0.604	0.931	1.125	0.737	1.203	0.621	0.892	0.466	0.543	3.163	0.958	0.527	0.811	0.962	0.83	1.057	0.679	0.906	0.491	0.604	3.132
Microdipodops pallidus	USNM 210397		1.102	0.573	1.329	1.251	0.782	1.212	0.626	0.978	0.508	0.587	3.597	0.898	0.472	0.927	1.059	0.776	1.192	0.738	1.078	0.549	0.794	3.613
Microdipodops pallidus	CM 18075		1.034	0.84	1.077	1.243	0.912	1.202	0.704	0.994	0.663	0.663	3.755	0.935	0.591	1.01	0.919	0.796	0.949	0.674	0.98	0.612	0.674	3.062
Microdipodops pallidus	CM 17092		1.094	0.627	0.876	0.966	0.725	1.057	0.694	0.725	0.513	0.513	3.3	0.979	0.491	1.037	1.037	0.763	1.068	0.641	0.824	0.732	0.549	3.08
Microdipodops pallidus	CM 17077		1.075	0.626	1.086	0.983	0.698	1.086	0.595	0.828	0.44	0.517	3.298	1.029	0.48	0.941	0.969	0.803	1.08	0.609	0.969	0.415	0.637	3.405

## Sheet: Postcranial
Species	Specimen	mt3W	mt4W	pph3L	pph3W	pph4L	pph4W
Aurimys xeros	UNSM 27016	1.91	1.99	8.07	1.54	6.57	1.13
Cupidinimus nebraskensis	CMNH 10193	0.8	0.7
Prodipodomys sp.	AMNH 87427	1.19	0.95	5.38	0.81	5.52	0.77
Dipodomys deserti	ETMNH Z2260	1.36	1.29	8.97	1.06	8.6	1.11
Dipodomys deserti	ETMNH Z2261	1.52	1.33	8.55	1.19	8.19	1.22
Dipodomys deserti	ETMNH Z2262	1.56	1.36	8.66	1.2	8.59	1.18
Dipodomys heermanni	ETMNH Z17752			9.28	1.1	9.12	1.09
Dipodomys merriami	ETMNH Z2256			5.66	0.85	5.04	0.79
Dipodomys merriami	ETMNH Z2251	1.04	1.04	5.92	0.77	5.88	0.74
Dipodomys merriami	ETMNH Z13469	1.09	0.94	6.24	0.76	6.09	0.7
Dipodomys spectabilis	ETMNH Z2255	1.38	1.31	6.62	1.2	6.43	1.21
Dipodomys sp.	ETMNH Z10311			7.63	1.22	7.4	1.19
