# Supplementary material for: The earliest dipodomyine heteromyid in North America and the phylogenetic relationships of geomorph rodents
Source: PeerJ. 2023 Mar 8;11:e14693. doi: 10.7717/peerj.14693 (PMC10007967; doi:10.7717/peerj.14693)
Supplement: Table S5 — Data files used in parsimony and Bayesian analyses are provided in Data S1 and S2, respectively. [file peerj-11-14693-s005.xlsx]

## Sheet: Sheet1
	1. Anterior alar fissure rises: (0) far posterior to M3, (1) just posteriorly to M3, (2) above or anterior to M3. [ordered]	2. Anterior edge of anterior alar fissure: (0) alisphenoid only, (1) palatine and alisphenoid	3. Posterior alar fissure: (0) absent, (1) present but separated from foramen ovale, (2) present and joined with foramen ovale	4. Suture of maxilla and alisphenoid (lateral view): (0) none, (1) narrow, (2) broad. [ordered]	5. Dorsal extent of alisphenoid: (0) low, (1) moderate, (2) high. [ordered]	6. Anterior division of temporalis arising on alisphenoid: (0) absent, (1) present.	7. Bone of the bulla: (0) single lamina, (1) trabeculate.	8. Anterior inflation of bulla: (0) absent, (1) present, (2) meeting at midline. [ordered]	9. Ventral inflation of auditory bulla: (0) absent, (1) small, (2) large. [ordered]	10. Lateral inflation of bulla: (0) absent, (1) small, (2) large. [ordered]	11. Posterior inflation of mastoid: (0) absent, (1) small, (2) large. [ordered]	12. Dorsal inflation of mastoid: (0) absent, (1) small, (2) great, (3) joining bulla anterior to meatus. [ordered]	13. Lateral inflation of mastoid: (0) absent, (1) small, (2) large. [ordered]	14. Anteromedial bullar processes: (0) absent, (1) present, (2) present and meeting in midline. [ordered]	15. Mastoid foramen: (0) absent, (1) minute, (2) large	16. Angle of the mandible: (0) straight, (1) deflected.	17. Angle of mandible: (0) large, (1) reduced	18. Relative height of coronoid process: (0) tall, (1) reduced, (2) very reduced. [ordered]	19. Insertion of masseter on dentary: (0) smooth or nearly smooth, (1) marked by a strong anterior ridge	20. Anterior end of masseteric fossa: (0) posterior to p4, (1) ventral to p4, (2) anterior to p4. [ordered]	21. Mental foramen: (0) anteroventral to masseter insertion, (1) anterodorsal to masseter insertion	22. Posterior end of incisor alveolus: (0) in plane of mandible, (1) projects laterally from mandible	23. Buccinator and masticatory foramina: (0) separate, (1) fused.	24. Accessory foramen ovale on alisphenoid: (0) present and complete, (1) present but lacking posterior margin, (2) absent.	25. Masticatory and buccinator foramina: (0) separated from accessory foramen ovale, (1) united with accessory foramen ovale	26. Foramen ovale: (0) surrounded by alisphenoid bone, (1) bounded posteriorly by auditory bulla	27. Central groove on upper incisor: (0) absent, (1) present.	28. Distinct tubercle or swelling at posteroventral border of infraorbital foramen: (0) absent, (1) small, (2) large. [ordered]	29. Infraorbital canal low: (0) lateral to rostrum, (1) depressed into rostrum, (2) depressed but laterally bulging	30. Shape of interparietal bone: (0) triangular, (1) oval	31. Interparietal: (0) without bullar constriction, (1) with some constriction, (2) with great constriction. [ordered]	32. Interparietal: (0) wide or constricted by bullar inflation, (1) narrow but not constricted by bullar inflation	33. Supraorbital bony flange: (0) absent, (1) present	34. Optic foramen separation from orbital fissure: (0) wide, (1) narrow, (2) absent	35. Size of optic foramen: (0) <1mm in diameter, (1) >1mm in diameter.	36. Ethmoid foramen dorsal to: (0) M3, (1) mid M2 to M2/M3 junction, (2) mid M2 to mid M1 [ordered]	37. Sphenofrontal foramen: (0) present, (1) absent	38. Unossified area on between maxillary and lacrimal bones: (0) absent, (1) present	39. Unossified area dorsal to orbitosphenoid: (0) absent, (1) present	40. Parapterygoid fossae: (0) absent, (1) shallow, (2) deep, (3) very deep.	41. Sphenopterygoid canal: (0) absent, (1) present	42. Posterior maxillary notch: (0) open, (1) closed, (2) absent.	43. Postglenoid foramen: (0) present, (1) absent	44. Postglenoid foramen: (0) in squamosal bone, (1) in squamosal bone/another between squamosal and periotic, (2) between bones and continuous with posterior alar fissure	45. Hamular process of pterygoid robust (0); or thin (1).	46. Incisive foramen length/diastemal length: (0) >0.40, (1) 0.20 to 0.40, (2) 0.10 to 0.19. [ordered]	47. Location of the premaxillary-maxillary suture crossing of the midline of the palate: (0) at the posterior end of the incisive foramen, (1) 1/3rd from posterior margin of the incisive foramen, (2) halfway through the incisive foramen. [ordered]	48. Rostrum: (0) not tapered, (1) tapered by descending nasals, (2) elevated nasals	49. Masseter: (0) protrogomorphous, (1) sciuromorphous
Paramys delicatus (outgroup)	0	0	0	0	1	0	0	0	0	0	0	0	0	0	0	0	0	0	0	0	0	0	0	0	0	0	0	0	0	0	0	0	0	0	0	0	0	0	0	0	0	1	0	0	0	0	1	0	0
Paradjidaumo trilophus (outgroup)	1	0	0	0	0	0	0	0	0	0	0	0	0	1	1	0	0	?	0	1	0	1	1	0	1	0	0	2	0	0	0	0	0	0	0	2	0	0	0	0	1	0	0	0	0	1	0	0	0
Megaheliscomys mcgrewi	0	0	?	0	1	0	?	0	0	0	0	0	0	0	?	?	?	?	?	?	?	?	1	0	0	0	0	1	?	?	?	?	0	?	?	?	?	0	?	1	0	0	0	?	0	0	2	1	1
Heliscomys vetus	?	?	?	?	?	?	?	?	?	?	?	?	?	?	?	0	?	?	1	2	1	?	?	?	?	?	0	2	2	?	?	?	?	?	?	?	?	?	?	?	?	0	?	?	?	0	2	1	1
Heliscomys ostranderi	0	0	0	0	1	0	0	0	0	0	1	?	0	1	?	0	0	1	{01}	2	1	1	1	?	1	?	0	2	2	?	?	?	0	1	1	0	0	0	0	1	0	0	?	?	0	0	2	1	1
Florentiamys kingi	0	1	0	1	2	0	?	0	1	0	0	0	0	1	2	0	0	1	0	2	0	?	1	0	1	1	0	1	0	0	0	0	1	1	1	1	1	0	0	1	0	1	0	0	0	2	0	?	1
Sanctimus simonisi	0	1	0	1	2	0	?	?	?	?	?	0	?	?	2	?	?	?	?	?	?	?	1	0	1	?	0	1	0	0	0	0	1	1	1	1	1	0	0	1	0	1	0	0	0	1	1	?	1
Sanctimus stouti	0	1	0	1	2	0	?	0	?	0	0	0	0	1	2	0	?	?	0	2	0	?	1	0	1	1	0	1	0	0	0	0	1	1	1	1	1	0	0	1	0	1	0	0	0	1	0	0	1
Sanctimus stuartae	0	1	?	?	?	?	?	0	1	0	?	?	?	?	?	?	?	?	0	2	0	?	?	0	?	?	0	1	0	?	?	?	1	?	?	1	?	0	?	?	?	1	?	?	?	1	0	?	1
Ecclesimus tenuiceps	2	1	?	1	1	0	?	0	1	1	0	0	0	1	2	?	?	?	?	?	?	?	1	0	1	?	0	1	1	0	0	0	0	0	1	1	1	?	0	1	0	1	0	0	?	1	1	?	1
Kirkomys nebraskensis	2	1	?	?	?	?	?	?	?	?	?	?	?	?	?	?	?	?	1	1	0	0	?	?	?	?	0	1	1	?	?	?	0	?	?	?	?	1	?	?	0	1	?	?	?	2	0	1	1
Hitonkala andersontau	0	1	0	1	1	0	0	0	1	1	?	0	?	1	?	?	0	?	1	2	0	0	1	0	1	1	0	1	1	0	0	0	0	0	1	0	0	0	0	1	1	1	0	0	0	2	0	1	1
Tenudomys dakotensis	0	0	1	1	?	0	?	0	2	0	0	0	0	?	1	0	0	?	0	2	0	0	?	?	?	1	0	0	1	0	0	0	1	?	0	1	1	0	?	1	1	1	0	1	1	2	2	0	1
Proharrymys schlaikjeri	0	0	1	1	1	0	0	1	2	1	?	?	?	?	?	0	0	?	1	2	0	1	0	0	0	1	0	1	1	0	?	0	0	?	?	?	?	?	?	?	?	1	?	?	?	0	0	?	1
Harrymys irvini	0	0	1	1	1	0	0	1	2	1	1	1	1	2	1	0	0	?	1	2	0	1	1	0	0	1	0	0	1	0	0	0	0	1	0	1	1	0	0	1	1	1	0	1	?	0	1	0	1
Trogomys rupinimenthae	?	?	?	1	?	?	?	?	?	?	?	?	?	?	?	0	0	?	1	2	0	0	?	?	?	?	0	0	1	?	?	?	0	?	?	?	?	?	?	?	?	1	?	?	1	1	1	?	1
Mojavemys galushai	?	?	?	?	?	?	?	?	?	?	?	?	?	?	?	?	0	?	1	2	0	?	?	?	?	?	1	2	1	?	?	?	?	?	?	?	?	1	?	1	?	1	?	?	?	{01}	1	1	1
Phelosaccomys neomexicanus	?	?	?	?	?	?	?	?	?	?	?	?	?	?	?	0	0	1	1	2	0	1	?	?	?	?	1	2	1	?	?	?	?	?	?	?	?	1	?	1	?	1	?	?	?	1	2	1	1
Mioheteromys amplissimus	1	0	?	1	1	0	?	?	?	?	?	?	?	?	?	?	?	?	1	2	0	?	1	0	0	?	1	2	1	?	?	?	0	?	?	?	?	?	1	1	?	1	?	?	1	1	1	0	1
Balantiomys oregonensis	1	0	?	1	1	0	?	1	?	?	?	0	?	?	?	1	0	?	1	2	0	1	?	?	?	?	0	1	1	0	0	0	0	?	?	2	?	0	1	1	1	1	?	?	?	1	1	0	1
Proheteromys latidens	?	?	?	1	?	?	0	1	1	1	0	0	0	0	?	1	0	?	1	2	0	1	1	0	1	1	0	1	1	?	?	?	0	?	?	?	?	?	?	1	?	?	?	?	?	1	1	1	1
Heteromys pictus	2	0	2	1	0	0	0	0	0	0	0	0	0	0	0	1	0	2	1	2	0	1	1	1	0	1	0	1	1	1	0	0	1	1	0	2	1	1	0	3	1	1	0	2	1	2	0	0	1
Heteromys desmarestianus	2	0	2	1	0	0	0	0	0	0	0	0	0	0	1	1	0	2	1	2	0	1	1	1	0	1	0	1	1	1	0	0	1	1	0	2	1	1	0	3	1	1	0	2	1	2	0	0	1
Schizodontomys amnicolus	1	0	?	1	0	0	0	1	2	2	1	1	1	0	1	?	0	1	1	2	0	?	1	2	0	1	0	2	1	1	0	0	1	1	1	1	?	?	0	1	1	1	?	?	0	1	0	1	1
Schizodontomys harkseni	?	0	?	1	?	0	0	2	1	2	1	2	1	0	1	1	0	?	{01}	2	0	1	1	2	0	1	0	2	1	?	?	?	1	?	?	1	1	0	0	1	1	1	0	2	0	1	0	1	1
Schizodontomys sulcidens	?	0	?	1	0	0	?	1	?	?	?	?	?	?	?	?	?	?	0	2	0	?	1	2	0	1	0	?	1	1	0	0	1	?	?	?	1	?	?	1	1	1	?	?	0	1	0	1	1
Bursagnathus aterosseus	?	?	?	1	0	0	0	1	2	1	0	1	0	2	?	1	0	2	1	2	0	0	0	2	0	1	0	1	1	1	0	0	1	?	?	2	1	?	1	3	1	?	0	2	?	1	0	1	1
Chaetodipus artus	1	0	2	1	0	0	1	1	1	1	1	1	1	1	1	1	0	2	1	2	0	1	0	2	0	0	1	0	1	1	0	0	1	?	?	?	1	?	1	3	1	1	0	2	0	2	0	0	1
Chaetodipus hispidus	1	0	2	1	0	0	1	1	1	1	1	1	1	1	1	1	0	2	1	2	0	1	0	2	0	0	1	0	1	1	0	0	1	1	1	2	1	1	1	3	1	1	0	2	0	2	0	0	1
Perognathus furlongi	?	?	?	1	?	?	?	?	?	?	?	?	?	?	?	?	?	?	?	?	?	?	?	?	?	?	1	0	1	?	?	?	?	?	?	?	?	1	?	?	?	1	?	?	?	2	0	1	1
Perognathus amplus	1	0	2	1	0	0	1	1	1	1	2	2	1	1	0	1	0	2	1	2	0	1	0	2	0	1	1	0	1	1	1	0	1	1	1	2	1	1	1	3	1	1	0	2	0	2	0	1	1
Mioperognathus willardi	1	0	?	1	0	0	0	1	0	1	1	1	0	1	0	?	?	?	?	?	?	?	0	2	0	1	1	1	1	1	0	0	1	1	1	?	1	1	1	2	1	1	1	?	0	1	0	1	1
Eochaetodipus asulcatus	?	?	?	1	0	0	0	0	?	?	1	1	1	1	0	?	0	?	1	2	0	1	0	0	0	0	0	1	1	1	0	0	1	?	?	1	1	?	0	2	0	1	1	?	?	2	1	?	1
Cupidinimus nebraskensis	0	0	?	?	1	?	0	?	?	2	?	2	2	?	?	1	0	?	1	2	0	0	?	?	?	?	0	0	1	?	1	0	1	?	?	?	?	1	1	?	?	?	?	?	?	2	2	1	1
Eodipodomys celtiservator	?	?	?	?	?	?	?	?	2	2	2	2	2	?	0	1	0	?	1	2	0	0	?	?	?	?	0	0	1	?	1	0	?	?	?	?	?	?	?	?	?	?	?	?	?	2	2	?	1
Prodipodomys FAM87427	?	?	?	?	?	?	?	?	?	2	2	3	2	?	?	1	0	2	1	2	0	1	?	?	?	?	1	0	1	?	2	0	?	?	?	?	?	?	?	3	1	1	?	?	1	2	2	1	1
Dipodomys merriami	0	0	2	1	1	0	0	2	1	2	2	3	2	2	0	1	0	2	1	2	0	1	0	2	0	1	1	{01}	1	?	2	0	1	2	1	1	0	1	{01}	3	1	1	1	2	1	1	2	1	1
Microdipodops megacephalus	1	0	2	1	1	0	0	2	1	2	2	3	2	2	0	1	0	2	1	2	0	1	0	2	0	1	1	0	1	?	2	0	1	2	1	1	1	1	1	1	1	1	1	2	0	1	2	1	1
Aurimys xeros UNSM 27016 (new genus and species)	0	0	2	1	0	0	0	1	2	2	2	2	2	1	0	1	0	?	1	2	0	1	1	2	0	1	0	1	1	1	1	0	0	?	?	?	?	1	?	?	?	1	0	2	?	?	1	1	1
Gregorymys formosus	2	0	1	2	1	1	?	1	1	1	1	1	1	2	2	?	0	?	0	2	0	1	0	0	0	1	0	1	0	0	0	1	0	0	1	1	0	0	0	3	1	1	0	1	1	1	0	1	1
Entoptychus UCMP65251	1	0	1	2	1	1	?	1	1	1	1	0	1	2	0	1	0	?	0	2	0	1	0	0	0	1	0	0	0	0	0	1	0	1	1	2	1	0	0	3	1	1	0	1	1	1	0	1	1
Pleurolicus sulcifrons	1	0	2	1	1	1	?	1	1	1	1	0	0	2	0	1	0	0	0	2	0	1	0	1	0	1	0	0	0	0	0	1	0	0	1	?	0	0	0	3	1	1	0	1	1	1	0	1	1
Pliosaccomys dubius	?	?	?	?	?	?	?	?	?	?	?	?	?	?	?	?	?	?	{01}	1	0	0	?	?	?	?	0	0	0	?	?	?	?	?	?	?	?	?	?	?	?	1	?	?	?	1	0	2	1
Parapliosaccomys cf. P. oregonensis	2	0	?	2	2	1	?	?	?	?	?	?	?	?	?	1	0	0	{01}	{12}	0	0	?	?	?	?	0	0	0	?	?	?	0	?	?	1	?	0	?	3	1	1	?	?	?	2	0	2	1
Thomomys talpoides	2	0	2	2	2	1	?	0	0	0	1	0	0	0	2	1	1	0	0	1	0	1	0	1	0	1	0	0	0	0	0	0	0	2	0	2	1	0	1	3	1	1	0	2	0	2	0	2	1
Geomys arenarius	2	0	?	2	2	1	?	0	0	0	1	0	0	0	2	1	1	0	0	1	0	1	0	1	0	1	1	0	0	0	0	0	0	2	0	2	1	0	1	3	1	1	0	2	0	2	0	2	1
Cratogeomys merriami	2	0	2	2	2	1	?	0	0	0	0	0	0	0	2	1	1	0	0	2	0	1	0	1	0	1	1	0	0	0	0	1	0	2	0	2	1	0	1	3	1	1	0	2	0	2	0	2	1
[truncated: 47 more columns]
